1 **International lineages of *Salmonella enterica* serovars isolated from chicken farms,**  
2 **Wakiso District, Uganda**

3

4 Takiyah A. Ball,<sup>a#</sup> Daniel F. Monte,<sup>b</sup> Awa Aidara-Kane,<sup>c</sup> Jorge Matheu,<sup>c</sup> Hongyu Ru,<sup>a</sup>  
5 Siddhartha Thakur,<sup>a</sup> Francis Ejobi,<sup>d</sup> Paula J. Fedorka-Cray<sup>a#</sup>

6

7 <sup>a</sup>Department of Population Health and Pathobiology, North Carolina State University,  
8 College of Veterinary Medicine, Raleigh, North Carolina

9 <sup>b</sup>Department of Food and Experimental Nutrition, Faculty of Pharmaceutical Sciences,  
10 University of São Paulo, Brazil

11 <sup>c</sup>Department of Food Safety and Zoonoses, World Health Organization (WHO) Geneva,  
12 Switzerland

13 <sup>d</sup>Department of Biosecurity, Ecosystems & Veterinary Public Health, College of  
14 Veterinary Medicine, Animal Resources and Biosecurity, Makerere University, Uganda

15

16 Running head: International high-risk clones of *Salmonella enterica* in chickens

17

18 Keywords: Antimicrobial resistance, high-risk clones, PMQR, *Salmonella enterica*,  
19 Uganda

20

21 #Address correspondence to Takiyah Ball, [taball@ncsu.edu](mailto:taball@ncsu.edu) and Paula J. Fedorka-Cray,

22 [pjcray@ncsu.edu](mailto:pjcray@ncsu.edu)

23

## 24 **ABSTRACT**

25 The growing occurrence of multidrug-resistant (MDR) *Salmonella enterica* in poultry has  
26 been reported with public health concern worldwide. We reported, recently, the  
27 occurrence of *Escherichia coli* and *Salmonella enterica* serovars carrying clinically  
28 relevant resistance genes in dairy cattle farms in the Wakiso District, Uganda,  
29 highlighting an urgent need to monitor food-producing animal environments. Here, we  
30 present the prevalence, antimicrobial resistance, and sequence type of 51 *Salmonella*  
31 isolates recovered from 400 environmental samples from chicken farms in Uganda.  
32 Among the *Salmonella* isolates, 32/51 (62.7%) were resistant to at least one  
33 antimicrobial, and 10/51 (19.6%) displayed multiple drug resistance. Through PCR, five  
34 replicon plasmids were identified among all chicken *Salmonella* including *IncFIIS* 17/51  
35 (33.3%), *IncI1 $\alpha$*  12/51 (23.5%), *IncP* 8/51 (15.7%), *IncX1* 8/51 (15.7%), and *IncX2* 1/51  
36 (2.0%). In addition, we identified replicons through WGS (*ColpVC* and *IncFIB*). A  
37 significant seasonal difference between chicken sampling periods was observed ( $p=$   
38 0.0017). We conclude that MDR *Salmonella* highlights the risks posed to the animals,  
39 environment, and humans for infection. Implementing a robust integrated surveillance  
40 system in Uganda will help monitor MDR to help control infectious threats.

41

## 42 **Introduction**

43 Multidrug-resistant (MDR) *Salmonella enterica* remains a major public health  
44 concern being reported in food, animal, human and environmental settings, particularly in  
45 developing countries. Additionally, international lineages have been readily spread

46 worldwide (1-6), leading a high impact on public health, which has been deemed a global  
47 pressure (WHO).

48 In Uganda, antibiotics are increasingly being used and not monitored or regulated  
49 in food-producing animals. This practice is well established to select antibiotic-resistant  
50 strains that can spread to humans through the food chain. In this concern, considering the  
51 lack of information regarding antimicrobial resistance (AMR) in developing countries,  
52 Uganda has plans for an integrated national surveillance system for foodborne pathogen  
53 which is included in the National Action Plan (NAP) on AMR, using a One Health  
54 approach (7).

55 Therefore, we present a cross-sectional study developed in chicken farms, in  
56 Uganda to investigate the prevalence, AMR, and their genomic aspects of *Salmonella*  
57 *enterica* serovars.

58

## 59 **Methods**

60 **Bacterial Isolates:** In our previous study, we reported on the phenotypic characterization  
61 of *Salmonella* isolates from cattle farms. We also collected *Salmonella* isolates from  
62 chicken farms in parallel to the cattle farms (5). This study was designed as two cross-  
63 sectional studies over one year. Sampling occurred over two seasons, the rainy season  
64 that began in March ending in September, and the dry season that began in June ending in  
65 December. Enrollment in the study occurred through contact with producers throughout  
66 the Wakiso district. A total of 20 chicken producers (20 farms) agreed to participate in  
67 the study. On-farm sampling was conducted once during the rainy and dry seasons  
68 totaling 39 collection periods (two farms dropped out of study in the rainy season). Ten

69 samples per farm were collected at each visit totaling 379 samples (one farm had nine  
70 samples).

71 Ten drag swabs were used per farm. Drag swabs (3" x 3" sterile gauze pads) in  
72 sterile skim milk was the preferred collection tool (Hardy Diagnostics, Inc., Santa Maria,  
73 CA). A sampling schematic was pre-drawn to ensure maximum sampling of the house  
74 floor environment, including inside diagonals, feeding and water containers, coops, and  
75 wall to wall samples. Swabs were individually placed in a sterile whirl-pak bag; the bag  
76 was kept on ice in a cooler prior to transport to the laboratory. Isolation of *Salmonella*  
77 was collected as previously described in Fedorka-Cray et al. (8).

78 **Antimicrobial Resistance testing:** A total of 51 *Salmonella* were isolated from chicken  
79 farms and tested for AMR using the National Antimicrobial Resistance Monitoring  
80 System (NARMS) gram-negative panels (Thermo Fisher Scientific Inc, Waltham, MA)  
81 as described by Ball et al. (5). All 51 isolates were frozen in LB broth with 30% glycerol  
82 (Thermo Fisher Scientific Inc, Waltham, MA) at -80°C.

83 **Molecular characterization:** The 51 *Salmonella* isolates were struck for isolation from  
84 the frozen stocks to Tryptic Soy Agar (TSA) with 5% sheep blood (BAP) (Thermo Fisher  
85 Scientific Inc, Waltham, MA) and incubated overnight at 37°C to ensure purity. Lysates  
86 were prepared by suspending a loopful of well-isolated colonies into 200 µl of molecular  
87 grade water and vortexed at maximum speed for several seconds. The suspension was  
88 boiled at 100°C for 10 minutes, centrifuged at 13 X 1000 rpm for 60 seconds, and the  
89 supernatant was collected for use as the DNA template. For PCR screening and whole  
90 genome sequencing, all methods were followed as described in Ball et al. (manuscript  
91 submitted).

92 **Whole-genome sequencing:** DNA extraction was performed using a commercial kit  
93 (QiAmp tissue, Qiagen, Germany) according to manufacturer's guidelines. Genomic  
94 DNA ( $n= 51$ ) were sequenced at a 300-bp paired-end-read using the Nextera XT library  
95 preparation kit at the MiSeq platform (Illumina, San Diego, CA). *De novo* assembly was  
96 achieved using CLC Genomics Workbench 10.1.1 (Qiagen). Resistome, plasmidome and  
97 multilocus sequence typing (MLST) were identified using multiple databases as  
98 ResFinder 3.1, PlasmidFinder 2.0, and MLST 2.0, respectively, available from the Center  
99 for Genomic Epidemiology (<http://genomicepidemiology.org/>). Sequence data were  
100 deposited in the GenomeTrakr Project.

101 **Statistical Analysis:** The prevalence of *Salmonella* were analyzed using WHONET and  
102 Microsoft Excel. A logistic regression model was used in SAS<sup>®</sup> software (SAS<sup>®</sup> Cary,  
103 NC) where season (rainy and dry) served as the factor. Farm was included as a random  
104 effect.

## 105 **Results**

106 Table 1 displays the results of serotype, AMR phenotype, AMR genotype, and plasmid  
107 identification. Fifty-one *Salmonella* were isolated (51/379; 13.5%) from chicken  
108 belonging eight different serotypes in order of highest to lowest, *Salmonella* serovar  
109 Enteritidis (31.3%); *S. Kentucky* (21.6%); *S. Zanzibar* and *S. Virchow* (15.7%); *S.*  
110 *Newport* and *S. serovar 42:r:-* (5.88%), *S. Typhimurium* (4%) and *S. Barranquilla* at  
111 2.0%. The prevalence of *Salmonella* was statistically significantly higher in the rainy  
112 season ( $p=0.0017$ ).

113 The AMR phenotype displayed resistance to eight antimicrobials including tetracycline  
114 (51%), nalidixic acid (37.3%), sulfisoxazole (23.5%), ciprofloxacin (21.6%),

115 streptomycin (13.7%), ampicillin (7.8%), sulfamethoxazole (3.9%), chloramphenicol  
116 (2%). Whole genome sequencing analysis revealed the presence of resistance genes to  
117 tetracycline [*tetA*; 53%], sulfonamides [*sul2* (21.5%); *sul3* (11.7%)], streptomycin [*strA*  
118 (19.6%); *strB* (19.6%)], aminoglycosides [*aph(6)-Id* (15.6%); *aph(3'')-Ib* (11.7%); *aadA1*  
119 (11.7%); *aadA2* (2%)],  $\beta$ -lactams [*bla*<sub>TEM-1B</sub>; 9.8%], quaternary ammonium [*qacL*; 5.8%],  
120 quinolones [*qnrS1*; 5.8%] and trimethoprim [*dfrA14*; 4%]. Other than acquiring  
121 resistance genes were assigned as quinolone resistance determining regions (QRDR) with  
122 point mutation in *gyrA* and *parC* as we can observe in Table 1. Ten isolates (19.6%)  
123 showed DNA gyrase (GyrA-S83F-D87N) with a double amino acid mutation in GyrA,  
124 serine to phenylalanine at codon 83 and aspartic acid to asparagine at 87, whereas eight  
125 isolates (15.6%) showed a single amino acid substitution of serine to tyrosine at codon  
126 83. For QRDR in *parC* was observed (n=10; 19.6%) only one substitution in serine to  
127 isoleucine at codon 80. No mutations were found in *gyrB* and *parE*.  
128 Afterward, the prevalence of plasmids related to resistance or virulence factors were  
129 screened through sequences. Six plasmids were identified being IncFII(S)-IncFIB (S)-  
130 ColpVC the most commons distributed in *S. Enteritidis*; Inc11-ColpVC in *S. Kentucky*  
131 and *S. Zanzibar*; IncX2 in *S. Newport*; Inc11-IncFII(S)-IncFIB (S)-ColpVC in *S.*  
132 *Typhimurium* and Col440I in *S. serovar 42:r:-*.  
133 In addition, nine sequence types (ST) such as ST11, ST198, ST466, ST16, ST166, ST46,  
134 ST19, ST1208 and ST3807 were associated with *S. Enteritidis*, *S. Kentucky*, *S. Zanzibar*,  
135 *S. Virchow*, *S. Newport*, *S. Newport*, *S. Typhimurium*, *S. serovar 42:r:-* and *S.*  
136 *Barranquilla*, respectively.  
137

138

**Table 1: Antimicrobial resistance phenotype and genotype comparison of *Salmonella* from chickens**

139

**in the Wakiso district of Uganda (n=51)**

| Sample ID | Serovar      | ST   | Resistance profile (MIC) | Resistance genes                                      | <i>gyrA</i> | <i>parC</i> | Plasmids                       | Plasmids (PCR) |
|-----------|--------------|------|--------------------------|-------------------------------------------------------|-------------|-------------|--------------------------------|----------------|
| SALM-44   | 42:r:-       | 1208 | STR                      | Pansusceptible                                        | none        | none        | Col440I                        | none           |
| SALM-46   | 42:r:-       | 1208 | STR                      | Pansusceptible                                        | none        | none        | none                           | none           |
| SALM-51   | 42:r:-       | 1208 | STR                      | Pansusceptible                                        | none        | none        | none                           | none           |
| SALM-47   | Barranquilla | 3807 | Pansusceptible           | Pansusceptible                                        | none        | none        | none                           | none           |
| SALM-1    | Enteritidis  | 11   | Pansusceptible           | <i>strA, strB, aadA1, blaTEM-1B, sul2, sul3, tetA</i> | none        | none        | IncFII(S), IncFIB (S), ColpVC  | IncFII(S)      |
| SALM-2    | Enteritidis  | 11   | Pansusceptible           | Pansusceptible                                        | none        | none        | IncFII(S), IncFIB (S), ColpVC  | IncFII(S)      |
| SALM-3    | Enteritidis  | 11   | Pansusceptible           | <i>sul2</i>                                           | none        | none        | IncFII(S), IncFIB (S), ColpVC  | IncFII(S)      |
| SALM-5    | Enteritidis  | 11   | Pansusceptible           | Pansusceptible                                        | none        | none        | IncFII(S), IncFIB (S), ColpVC  | IncFII(S)      |
| SALM-7    | Enteritidis  | 11   | Pansusceptible           | Pansusceptible                                        | none        | none        | IncFII(S), IncFIB (S), ColpVC  | IncFII(S)      |
| SALM-26   | Enteritidis  | 11   | Pansusceptible           | Pansusceptible                                        | none        | none        | IncFII(S), IncFIB (S)          | IncFII(S)      |
| SALM-28   | Enteritidis  | 11   | Pansusceptible           | Pansusceptible                                        | none        | none        | IncFII(S), IncFIB (S)          | IncFII(S)      |
| SALM-29   | Enteritidis  | 11   | Pansusceptible           | Pansusceptible                                        | none        | none        | IncFII(S), IncFIB (S)          | IncFII(S)      |
| SALM-30   | Enteritidis  | 11   | Pansusceptible           | Pansusceptible                                        | none        | none        | IncFII(S), IncFIB (S)          | IncFII(S)      |
| SALM-31   | Enteritidis  | 11   | Pansusceptible           | Pansusceptible                                        | none        | none        | IncFII(S), IncFIB (S)          | IncFII(S)      |
| SALM-32   | Enteritidis  | 11   | Pansusceptible           | Pansusceptible                                        | none        | none        | IncFII(S), IncFIB (S)          | IncFII(S)      |
| SALM-33   | Enteritidis  | 11   | Pansusceptible           | Pansusceptible                                        | none        | none        | IncFII(S), IncFIB (S)          | IncFII(S)      |
| SALM-41   | Enteritidis  | 11   | Pansusceptible           | Pansusceptible                                        | none        | none        | IncFII(S), IncFIB (S), Col440I | none           |
| SALM-42   | Enteritidis  | 11   | Pansusceptible           | Pansusceptible                                        | none        | none        | none                           | IncFII(S)      |
| SALM-43   | Enteritidis  | 11   | Pansusceptible           | Pansusceptible                                        | none        | none        | IncFII(S), IncFIB (S), Col440I | IncFII(S)      |
| SALM-49   | Enteritidis  | 11   | Pansusceptible           | Pansusceptible                                        | none        | none        | IncFII(S), IncFIB (S)          | none           |

140

Table 1 cont'd

| Sample ID | Serovar     | ST  | Resistance profile (MIC)          | Resistance genes                                                                                                                                                     | <i>gyrA</i> | <i>parC</i> | Plasmids                             | Plasmids (PCR)             |
|-----------|-------------|-----|-----------------------------------|----------------------------------------------------------------------------------------------------------------------------------------------------------------------|-------------|-------------|--------------------------------------|----------------------------|
| SALM-8    | Kentucky    | 198 | AMP, CIP, NAL, STR, SOX, TCY, SXT | <i>aadA1</i> , <i>aph(6)-Id</i> , <i>strA</i> , <i>strB</i> , <i>blaTEM-1B</i> , <i>dfrA14</i> , <i>qacL</i> , <i>sul2</i> , <i>sul3</i> , <i>tet(A)</i>             | S83F/D87N   | S80I        | ColpVC, Incl1                        | Incl1 $\alpha$             |
| SALM-9    | Kentucky    | 198 | CIP, NAL                          | Pansusceptible                                                                                                                                                       | S83F/D87N   | S80I        | ColpVC                               | none                       |
| SALM-10   | Kentucky    | 198 | CIP, NAL, STR, SOX, TCY           | <i>aph(3'')-Ib</i> , <i>aph(6)-Id</i> , <i>strA</i> , <i>strB</i> , <i>sul2</i> , <i>tet(A)</i>                                                                      | S83F/D87N   | S80I        | ColpVC                               | none                       |
| SALM-11   | Kentucky    | 198 | CIP, NAL, STR, SOX, TCY           | <i>aph(3'')-Ib</i> , <i>aph(6)-Id</i> , <i>strA</i> , <i>strB</i> , <i>sul2</i> , <i>tet(A)</i>                                                                      | S83F/D87N   | S80I        | ColpVC                               | none                       |
| SALM-12   | Kentucky    | 198 | CIP, NAL, STR, SOX, TCY           | <i>aph(3'')-Ib</i> , <i>aph(6)-Id</i> , <i>strA</i> , <i>strB</i> , <i>sul2</i> , <i>tet(A)</i>                                                                      | S83F/D87N   | S80I        | ColpVC                               | none                       |
| SALM-13   | Kentucky    | 198 | CIP, NAL, STR, SOX, TCY           | <i>aph(3'')-Ib</i> , <i>aph(6)-Id</i> , <i>strA</i> , <i>strB</i> , <i>sul2</i> , <i>tet(A)</i>                                                                      | S83F/D87N   | S80I        | ColpVC                               | none                       |
| SALM-14   | Kentucky    | 198 | CIP, NAL, STR, SOX, TCY           | <i>aph(3'')-Ib</i> , <i>aph(6)-Id</i> , <i>strA</i> , <i>strB</i> , <i>sul2</i> , <i>tet(A)</i>                                                                      | S83F/D87N   | S80I        | ColpVC                               | none                       |
| SALM-15   | Kentucky    | 198 | CIP, NAL, STR, SOX, TCY           | <i>aph(3'')-Ib</i> , <i>aph(6)-Id</i> , <i>strA</i> , <i>strB</i> , <i>sul2</i> , <i>tet(A)</i>                                                                      | S83F/D87N   | S80I        | ColpVC                               | none                       |
| SALM-16   | Kentucky    | 198 | CHL, CIP, NAL, STR, SOX, TCY, SXT | <i>qnrS1</i> , <i>aadA1</i> , <i>aadA2</i> , <i>aph(6)-Id</i> , <i>strA</i> , <i>strB</i> , <i>cmlA1</i> , <i>dfrA14</i> , <i>sul2</i> , <i>sul3</i> , <i>tet(A)</i> | S83F/D87N   | S80I        | ColpVC, Incl1                        | Incl1 $\alpha$             |
| SALM-17   | Kentucky    | 198 | CIP, NAL, STR, SOX, TCY           | <i>strA</i> , <i>strB</i> , <i>sul2</i> , <i>tetA</i>                                                                                                                | none        | none        | ColpVC                               | none                       |
| SALM-18   | Kentucky    | 198 | AMP, CIP, NAL, SOX                | <i>aadA1</i> , <i>blaTEM-1B</i> , <i>sul3</i>                                                                                                                        | S83F/D87N   | S80I        | ColpVC, Incl1                        | Incl1 $\alpha$             |
| SALM-45   | Newport     | 166 | NAL, TCY                          | <i>qnrS1</i> , <i>tetA</i>                                                                                                                                           | none        | none        | IncX2                                | IncX2                      |
| SALM-50   | Newport     | 46  | Pansusceptible                    | Pansusceptible                                                                                                                                                       | none        | none        | none                                 | none                       |
| SALM-4    | Typhimurium | 19  | AMP, SOX                          | <i>aadA1</i> , <i>blaTEM-1B</i> , <i>qacL</i> , <i>sul3</i>                                                                                                          | none        | none        | Incl1, IncFII(S), IncFIB (S), ColpVC | Incl1 $\alpha$ , IncFII(S) |
| SALM-6    | Typhimurium | 19  | AMP, SOX                          | <i>aadA1</i> , <i>blaTEM-1B</i> , <i>qacL</i> , <i>sul3</i>                                                                                                          | none        | none        | Incl1, IncFII(S), IncFIB (S), ColpVC | Incl1 $\alpha$ , IncFII(S) |
| SALM-34   | Virchow     | 16  | NAL, TCY                          | <i>tetA</i>                                                                                                                                                          | S83Y        | none        | none                                 | IncP, IncX1                |
| SALM-35   | Virchow     | 16  | NAL, TCY                          | <i>tetA</i>                                                                                                                                                          | S83Y        | none        | none                                 | IncP, IncX1                |



144

Table 1 cont'd

| Sample ID | Serovar  | ST  | Resistance profile (MIC) | Resistance genes | <i>gyrA</i> | <i>parC</i> | Plasmids      | Plasmids (PCR) |
|-----------|----------|-----|--------------------------|------------------|-------------|-------------|---------------|----------------|
| SALM-36   | Virchow  | 16  | NAL, TCY                 | <i>tetA</i>      | S83Y        | none        | none          | IncP, IncX1    |
| SALM-37   | Virchow  | 16  | NAL, TCY                 | <i>tetA</i>      | S83Y        | none        | none          | IncP, IncX1    |
| SALM-38   | Virchow  | 16  | NAL, TCY                 | <i>tetA</i>      | S83Y        | none        | none          | IncP, IncX1    |
| SALM-39   | Virchow  | 16  | NAL, TCY                 | <i>tetA</i>      | S83Y        | none        | none          | IncP, IncX1    |
| SALM-40   | Virchow  | 16  | NAL, TCY                 | <i>tetA</i>      | S83Y        | none        | none          | IncP, IncX1    |
| SALM-48   | Virchow  | 16  | NAL, TCY                 | <i>tetA</i>      | S83Y        | none        | none          | IncP, IncX1    |
| SALM-19   | Zanzibar | 466 | TCY                      | <i>tetA</i>      | none        | none        | Incl1         | Incl1 $\alpha$ |
| SALM-20   | Zanzibar | 466 | TCY                      | <i>tetA</i>      | none        | none        | Incl1         | Incl1 $\alpha$ |
| SALM-21   | Zanzibar | 466 | TCY                      | <i>tetA</i>      | none        | none        | ColpVC, Incl1 | Incl1 $\alpha$ |
| SALM-22   | Zanzibar | 466 | TCY                      | <i>tetA</i>      | none        | none        | Incl1         | Incl1 $\alpha$ |
| SALM-23   | Zanzibar | 466 | TCY                      | <i>tetA</i>      | none        | none        | ColpVC, Incl1 | Incl1 $\alpha$ |
| SALM-24   | Zanzibar | 466 | Pansusceptible           | Pansusceptible   | none        | none        | ColpVC        | Incl1 $\alpha$ |
| SALM-25   | Zanzibar | 466 | TCY                      | <i>tetA</i>      | none        | none        | Incl1         | Incl1 $\alpha$ |
| SALM-27   | Zanzibar | 466 | TCY                      | <i>tetA</i>      | none        | none        | Incl1         | Incl1 $\alpha$ |

145

146

147

148

149 **Discussion**

150           The percent prevalence of *Salmonella* (13.5%) in this study highlights the  
151 potential risk to the cross-contamination between human and poultry in Ugandan  
152 households. There are limited reports on the prevalence of *Salmonella* on chicken farms  
153 and the reports that are available show very little resistance compared to this study.  
154 Afema et al. reported 6.6% *Salmonella* was detected in live birds markets within  
155 Kampala, Uganda (9). We also learned that there was a seasonal effect in the recovery of  
156 *Salmonella*. Uganda typically has a rainy season that occurs between March to May and  
157 October to December (10). For recovery from chicken farms, a significant difference  
158 ( $p=0.0017$ ) for recovery of *Salmonella* between the rainy and dry seasons as a higher  
159 prevalence of *Salmonella* was observed. During the rainy season, there is an increase in  
160 humidity as well as moisture which has been reported to influence the recovery of several  
161 bacterial species in poultry (11).

162           The serotype distribution in this study indicated that *Salmonella* serovars  
163 Enteritidis and Kentucky were most often recovered from chicken samples. This is  
164 comparable to the most commonly seen serotypes in chickens reported in the US (12).  
165 Kentucky has previously been reported in Uganda in humans, poultry, and the  
166 environment (9).

167           Among chicken isolates, *Salmonella* presented with MDR phenotypes to the  
168 antimicrobials tested. Approximately 38% of the isolates were resistant to two or more  
169 classes of antimicrobials, including two isolates resistant to seven antimicrobials. The  
170 *Salmonella* serovar Kentucky isolates in this study presented MDR to over five  
171 (ciprofloxacin, nalidixic acid, streptomycin, sulfisoxazole, and tetracycline) or seven

172 (chloramphenicol, ampicillin, ciprofloxacin, nalidixic acid, streptomycin, sulfisoxazole,  
173 tetracycline, and trimethoprim-sulfamethoxazole) antimicrobials. All *Salmonella* serovar  
174 Kentucky isolates resistant to ciprofloxacin. Since the early 2000s, ciprofloxacin  
175 resistance for *Salmonella* serovar Kentucky has been on the rise, especially from travelers  
176 to northern and eastern Africa (13). Rickert-Hartman et al. found that 9% of the  
177 *Salmonella* serovar Kentucky isolated from travelers were ciprofloxacin resistant. An  
178 interesting note was that poultry was thought to be a reservoir for these resistant strains  
179 (13, 14). Cases of ciprofloxacin-resistant Kentucky have been seen in the US from  
180 travelers from India, resulting in seven infected with one death (13). In this regard, the  
181 emergence of *S. Kentucky* ST198 pose a major threat to public health worldwide,  
182 particularly for being highly drug-resistant (15) and has been reported in different sources  
183 including retail chicken carcasses (16). Additionally, the presence of chromosome  
184 mutation can be useful for tracking the pandemic ciprofloxacin-resistant *S. Kentucky*  
185 strain ST198 from geographically distinct regions (15).

186 We further characterized these isolates with WGS to see if concordance was seen  
187 and if isolates presented  $\beta$ -lactamase resistance genes. TEM-1B was identified in five  
188 isolates that PCR methods did not identify. In previous studies (17), discrepancies were  
189 seen between phenotypic resistance and genotypic analysis using WGS. It was reported  
190 that a MIC might not reach the breakpoint, but resistance genes were present (17).

191 Five of the 28 plasmids that were screened through PCR were observed in  
192 multiple isolates: *IncFIIS* (17/51; 33.3%), *IncII $\alpha$*  (12/51; 23.5%), *IncP* (8/51; 15.7%),  
193 *IncX1* (8/51; 15.7%), and *IncX2* (1/51; 2.0%). After analyzing the WGS sequences for  
194 plasmids, we notice a difference in the plasmids that were identified. In 12 isolates, there

195 was concordance with the *IncI1 $\alpha$* , with seven of the 12 having an additional plasmid  
196 (*ColpVC*) that was not screened in the PCR and two with *IncFIIS* plasmid. Seventeen  
197 isolates were in concordance with the *IncFIIS* plasmid. These same 17 isolates also  
198 presented *IncFIB* (S) plasmids, and *ColpVC* and *Col4401* were identified in seven and  
199 two isolates, respectively. *IncX2* and *IncP* were not identified in the WGS analysis as  
200 was in the PCR. Ten isolates were negative for PCR, but WGS identified as *ColpVC*  
201 (nine isolates) and *Col4401* (one isolate).

202 *IncFIIS* was the most common plasmid identified in this study at 33.3% (17/51)  
203 Studies have shown that bacterial isolates containing *bla*<sub>CTX-M-1</sub>, harbor the *IncFIIS* along  
204 with other incompatibility plasmids (18). *IncI* plasmids are known to be distributed  
205 throughout many serotypes of *Salmonella* and predominate in both *E.coli* and *Salmonella*  
206 (19-21). In this study, *IncI1 $\alpha$*  was observed among *Salmonella* serovars such as Zanzibar,  
207 Kentucky, and Typhimurium. All isolates from *Salmonella* serovar Kentucky came from  
208 the same farm, as well as isolates with *Salmonella* serovar Typhimurium.

209 *IncP* and *IncX1* were the next most common plasmids seen in this study through  
210 PCR. Both were present in the *Salmonella* serovar Virchow isolates. It has been reported  
211 that *IncP* can spread through groups of bacteria via conjugative transfer and code for  
212 broad range antimicrobial resistance. *IncP* is highly likely to be found in manure,  
213 wastewater, and soil (22). *IncX1* is commonly found as a narrow host-range plasmid in  
214 *Enterobacteriaceae*, also spreading to other bacteria via conjugative transfer (23).

## 215 **Conclusion**

216 In summary, we present in this study the clonal distribution of eight *Salmonella*  
217 enterica serovars displaying resistance to clinically important antibiotics. Of these, the

218 presence of international lineages as ciprofloxacin-resistant *S. Kentucky* sequence type  
219 198 in chicken farms raises a public concern; given that fluoroquinolones are the first  
220 treatment choice. Our findings suggest that endemic dissemination of resistant serovars,  
221 adding valuable information in the epidemiological surveillance in Uganda. Therefore,  
222 these results may encourage addition genomic surveillance studies in this region to aid  
223 the development of mitigation strategies to limit the global distribution of these multi-  
224 drug resistant *Salmonella enterica*.

225

## 226 **Acknowledgments**

227 We would like to acknowledge our funding sources from North Carolina State  
228 University (NCSU), College of Veterinary Medicine and the WHO AGISAR Secretariat;  
229 Our colleagues at Makerere University Dr. Eddie Wampande, Sarah Tegule, Samuel  
230 Maling, David Apollo Munanura, Allan Odeke, Disan Muhangazi, Mark Ogal, Mutumba  
231 Paul, and Elizabeth Basemera; Our colleagues at the NCSU, College of Veterinary  
232 Medicine Diagnostic Laboratory, Dr. Megan Jacob.

## 233 **References**

234

- 235 1. Djeflal S, Mamache B, Elgroud R, Hireche S, Bouaziz O. Prevalence, and risk factors  
236 for *Salmonella* spp. contamination in broiler chicken farms and slaughterhouses in the  
237 northeast of Algeria. *Veterinary world*. 2018;11(8):1102-8.
- 238 2. Elnekave E, Hong S, Mather AE, Boxrud D, Taylor AJ, Lappi V, et al. *Salmonella*  
239 *enterica* Serotype 4,[5],12:i:- in Swine in the United States Midwest: An Emerging  
240 Multidrug-Resistant Clade. *Clinical infectious diseases: an official publication of the*  
241 *Infectious Diseases Society of America*. 2018;66(6):877-85.
- 242 3. Li XP, Fang LX, Song JQ, Xia J, Huo W, Fang JT, et al. Clonal spread of *mcr-1* in  
243 PMQR-carrying ST34 *Salmonella* isolates from animals in China. *Scientific reports*.  
244 2016;6:38511.
- 245 4. Nadimpalli M, Fabre L, Yith V, Sem N, Gouali M, Delarocque-Astagneau E, et al.  
246 CTX-M-55-type ESBL-producing *Salmonella enterica* are emerging among retail  
247 meats in Phnom Penh, Cambodia. *The Journal of antimicrobial chemotherapy*.  
248 2019;74(2):342-8.

- 249 5. Ball TA, Monte DF, Aidara-Kane A, Matheu-Alvarez J, Ru H, Thakur S, et al.  
250 Phenotypic and Genotypic Characterization of *Escherichia coli* and *Salmonella*  
251 enterica from Dairy Cattle Farms in the Wakiso District, Uganda: A Cross-Sectional  
252 Study. *Foodborne pathogens and disease*. 2019;16(1):54-9.
- 253 6. Toro M, Retamal P, Ayers S, Barreto M, Allard M, Brown EW, et al. Whole-Genome  
254 Sequencing Analysis of *Salmonella* enterica Serovar Enteritidis Isolates in Chile  
255 Provides Insights into Possible Transmission between Gulls, Poultry, and Humans.  
256 *Applied and environmental microbiology*. 2016;82(20):6223-32.
- 257 7. UNAS, CDDEP, GARP-Uganda, Mpairwe Y, Wamala S. Antibiotic Resistance in  
258 Uganda: Situation Analysis and Recommendations. Kampala, Uganda: Uganda  
259 National Academy of Sciences; Center for Disease Dynamics, Economics & Policy;  
260 2015.
- 261 8. Fedorka-Cray PJ, Bush E, Thomas L, Gray J, McKean J. *Salmonella* Infection in Herds  
262 of Swine. 1996.
- 263 9. Afema JA, Byarugaba DK, Shah DH, Atukwase E, Nambi M, Sischo WM. Potential  
264 Sources and Transmission of *Salmonella* and Antimicrobial Resistance in Kampala,  
265 Uganda. *PloS one*. 2016;11(3):e0152130.
- 266 10. Kigozi R, Zinszer K, Mpimbaza A, Sserwanga A, Kigozi SP, Kanya M. Assessing  
267 temporal associations between environmental factors and malaria morbidity at  
268 varying transmission settings in Uganda. *Malar J*. 2016;15(1):511.
- 269 11. Akil L, Ahmad HA, Reddy RS. Effects of climate change on *Salmonella* infections.  
270 *Foodborne pathogens and disease*. 2014;11(12):974-80.
- 271 12. United States Department of Agriculture. Serotypes Profile of *Salmonella* Isolates  
272 from Meat and Poultry Products, January 1998 through December 2014 2014  
273 [Available from [https://www.fsis.usda.gov/wps/portal/fsis/topics/data-collection-and-](https://www.fsis.usda.gov/wps/portal/fsis/topics/data-collection-and-reports/microbiology/annual-serotyping-reports)  
274 [reports/microbiology/annual-serotyping-reports](https://www.fsis.usda.gov/wps/portal/fsis/topics/data-collection-and-reports/microbiology/annual-serotyping-reports)].
- 275 13. Rickert-Hartman R, Folster JP. Ciprofloxacin-resistant *Salmonella* enterica serotype  
276 Kentucky sequence type 198. *Emerg Infect Dis*. 2014;20(5):910-1.
- 277 14. Weill FX, Bertrand S, Guesnier F, Baucheron S, Cloeckaert A, Grimont PA.  
278 Ciprofloxacin-resistant *Salmonella* Kentucky in travelers. *Emerg Infect Dis*.  
279 2006;12(10):1611-2.
- 280 15. Le Hello S, Harrois D, Bouchrif B, Sontag L, Elhani D, Guibert V, et al. Highly drug-  
281 resistant *Salmonella* enterica serotype Kentucky ST198-X1: a microbiological study.  
282 *The Lancet Infectious Diseases*. 2013;13(8):672-9.
- 283 16. Ramadan H, Gupta SK, Sharma P, Sallam KI, Hiott LM, Elsayed H, et al. Draft  
284 genome sequences of two ciprofloxacin-resistant *Salmonella* enterica subsp. enterica  
285 serotype Kentucky ST198 isolated from retail chicken carcasses in Egypt. *Journal of*  
286 *global antimicrobial resistance*. 2018;14:101-3.
- 287 17. McDermott PF, Tyson GH, Kabera C, Chen Y, Li C, Folster JP, et al. Whole-Genome  
288 Sequencing for Detecting Antimicrobial Resistance in Nontyphoidal *Salmonella*.  
289 *Antimicrobial agents and chemotherapy*. 2016;60(9):5515-20.
- 290 18. Zurfluh K, Jakobi G, Stephan R, Hachler H, Nuesch-Inderbinen M. Replicon typing  
291 of plasmids carrying bla CTX-M-1 in Enterobacteriaceae of animal, environmental  
292 and human origin. *Front Microbiol*. 2014;5:555.
- 293 19. Dierikx C, van Essen-Zandbergen A, Veldman K, Smith H, Mevius D. Increased

- 294 detection of extended-spectrum beta-lactamase producing *Salmonella* enterica, and  
295 *Escherichia coli* isolates from poultry. *Vet Microbiol.* 2010;145(3-4):273-8.
- 296 20. Garcia-Fernandez A, Chiaretto G, Bertini A, Villa L, Fortini D, Ricci A, et al.  
297 Multilocus sequence typing of IncI1 plasmids carrying extended-spectrum beta-  
298 lactamases in *Escherichia coli* and *Salmonella* of human and animal origin. *The*  
299 *Journal of antimicrobial chemotherapy.* 2008;61(6):1229-33.
- 300 21. Lindsey RL, Fedorka-Cray PJ, Frye JG, Meinersmann RJ. Inc A/C plasmids are  
301 prevalent in multidrug-resistant *Salmonella* enterica isolates. *Applied and*  
302 *environmental microbiology.* 2009;75(7):1908-15.
- 303 22. Popowska M, Krawczyk-Balska A. Broad-host-range IncP-1 plasmids and their  
304 resistance potential. *Front Microbiol.* 2013;4:44.
- 305 23. Norman A, Hansen LH, She Q, Sorensen SJ. Nucleotide sequence of pOLA52: a  
306 conjugative IncX1 plasmid from *Escherichia coli* which enables biofilm formation  
307 and multidrug efflux. *Plasmid.* 2008;60(1):59-74.
- 308  
309
